# Supplementary material for: Protective Effects of Astragaloside IV against LPS-Induced Endometritis in Mice through Inhibiting Activation of the NF-κB, p38 and JNK Signaling Pathways
Source: MDPI journal article supplement (doi:10.3390/molecules24020373), 2019-01-21
Supplement: s1 [file s1]

## Supplementary Material

Figure S1

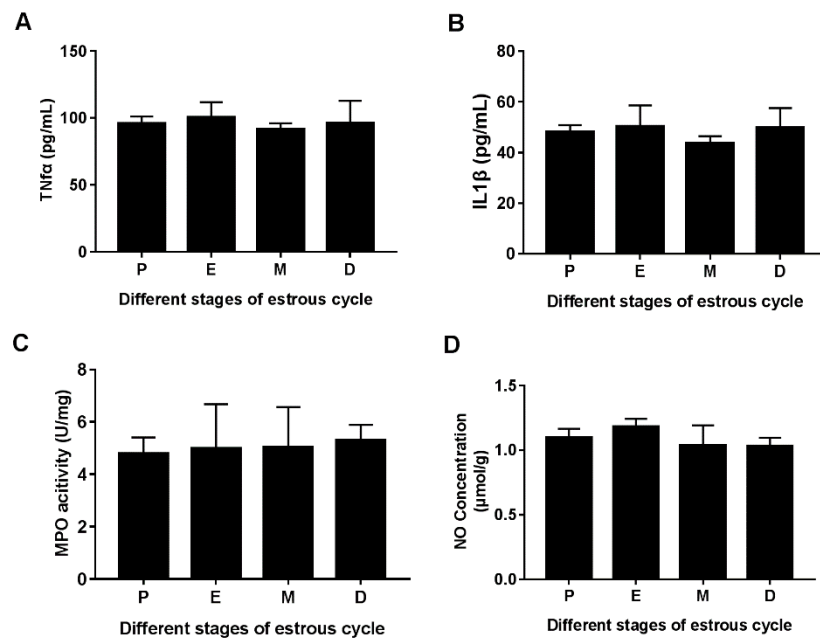

**Figure S1.** Production of TNF $\alpha$  (a) and IL-1 $\beta$  (b), the activity of MPO (c), and NO concentration (d) of uterine tissues of mice in different stages (proestrus stage, estrus stage, metestrus stage and diestrus stage) of the estrus cycle. The data are shown as mean  $\pm$  SD, n = 8.
